# Supplementary material for: Phenolome of Asian Agrimony Tea (Agrimonia asiatica Juz., Rosaceae): LC-MS Profile, α-Glucosidase Inhibitory Potential and Stability
Source: PubMed Central journal article supplement (PMC7598702; doi:10.3390/foods9101348), 2020-09-23
Supplement: foods-09-01348-s001.pdf [file foods-09-01348-s001.pdf]

Supplementary Materials

# Phenolome of Asian Agrimony Tea (*Agrimonia asiatica* Juz., Rosaceae): LC-MS Profile, $\alpha$ -Glucosidase Inhibitory Potential and Stability

Nina I. Kashchenko \* and Daniil N. Olennikov

Laboratory of Medical and Biological Research, Institute of General and Experimental Biology, Siberian Division, Russian Academy of Science, 6 Sakh'yanyovoy Street, Ulan-Ude 670047, Russia; olennikovdn@mail.ru (D.N.O.)

\* Correspondence: ninkk@mail.ru; Tel.: +79-0216-00-627 (D.N.O.)

Received: date; Accepted: date; Published: date

## Content

**Table S1.** Description of 85 Rosaceous plants used in study.

**Table S2.** Mass spectrometric parameters of compounds 1–60.

**Table S1.** Description of 85 Rosaceous plants used in study.

| Species                                             | Collection place                                              | Coordinates                                        | Collection date |
|-----------------------------------------------------|---------------------------------------------------------------|----------------------------------------------------|-----------------|
| <i>Agrimonia pilosa</i> Ledeb.                      | Republic Buryatia, Kyren<br>(Tunkinsky District)              | 51°41'15.4501'' N,<br>102°8'21.8127'' E, 947<br>m  | 21.VII.2019     |
| <i>Alchemilla anisopoda</i> Juz.                    | Republic Buryatia, Kabansk<br>(Kabansky District)             | 52°2'54.5243'' N,<br>106°37'34.5456'' E, 461<br>m  | 23.VII.2019     |
| <i>A. flavescens</i> Buser                          | Republic Buryatia, Kolobki<br>(Ivolginsky District)           | 51°38'53.0286'' N,<br>107°23'54.2239'' E, 506<br>m | 02.VII.2019     |
| <i>A. subcrenata</i> Buser                          | Republic Buryatia,<br>Severobaykalsk                          | 55°38'56.8229'' N,<br>109°20'28.5324'' E, 582<br>m | 02.VIII.2019    |
| <i>Armeniaca sibirica</i> (L.) Lam.                 | Republic Buryatia, Podlopatki<br>(Mukhorshibirsky District)   | 50°54'50.8598'' N,<br>107°6'9.5972'' E, 647 m      | 29.V.2018       |
| <i>Chamaerhodos erecta</i> (L.) Bunge               | Republic Buryatia, Zhemchug<br>(Tunkinsky District)           | 51°41'51.0445'' N,<br>102°28'14.9261'' E, 722<br>m | 17.VII.2019     |
| <i>C. grandiflora</i> (Pall. ex Schult.) Bunge      | Republic Buryatia, Tankhoy<br>(Kabansky District)             | 51°32'59.4879'' N,<br>105°7'15.1616'' E, 504<br>m  | 15.VII.2018     |
| <i>Cotoneaster lucidus</i> Schldtl.                 | Republic Buryatia, Zaigrayevoy<br>(Zaigraevsky District)      | 51°51'6.8316'' N,<br>108°18'36.9388'' E, 639<br>m  | 11.VII.2019     |
| <i>Cotoneaster melanocarpus</i> Fisch. ex<br>Blytt  | Republic Buryatia, Mukhorshibir<br>(Mukhorshibirsky district) | 51°1'54.8212'' N,<br>107°54'10.4700'' E, 1003<br>m | 18.VII.2019     |
| <i>C. mongolicus</i> Pojark.                        | Republic Buryatia, Zun-Murino<br>(Tunkinsky District)         | 51°44'27.2468'' N,<br>102°53'40.4121'' E, 724<br>m | 23.VII.2018     |
| <i>C. neopopovii</i> Czerep.                        | Republic Buryatia, Baunt<br>(Bauntovsky District)             | 55°15'37.2172'' N,<br>113°8'57.2040'' E, 1096<br>m | 01.VIII.2019    |
| <i>C. tjuliniae</i> Pojark. ex Peschkova            | Republic Buryatia, Kolobki<br>(Ivolginsky District)           | 51°38'53.0286'' N,<br>107°23'54.2239'' E, 506<br>m | 02.VII.2019     |
| <i>C. uniflorus</i> Bunge                           | Republic Buryatia, Zhemchug<br>(Tunkinsky District)           | 51°41'51.0445'' N,<br>102°28'14.9261'' E, 722<br>m | 17.VII.2019     |
| <i>Crataegus dahurica</i> Koehne ex<br>C.K.Schneid. | Republic Buryatia, Podlopatki<br>(Mukhorshibirsky District)   | 50°54'50.8598'' N,<br>107°6'9.5972'' E, 647 m      | 29.V.2018       |
| <i>C. maximowiczii</i> C.K.Schneid.                 | Republic Buryatia, Zun-Murino<br>(Tunkinsky District)         | 51°44'27.2468'' N,<br>102°53'40.4121'' E, 724<br>m | 23.VII.2018     |

Table S1. Continuation

| Species                                                       | Collection place                                           | Coordinates                                     | Collection date |
|---------------------------------------------------------------|------------------------------------------------------------|-------------------------------------------------|-----------------|
| <i>C. sanguinea</i> Pall.                                     | Republic Buryatia, Mukhorshibir (Mukhorshibirsky district) | 51°1'54.8212'' N,<br>107°54'10.4700'' E, 1003 m | 18.VII.2019     |
| <i>Dasiphora fruticosa</i> (L.) Rydb.                         | Republic Buryatia, Tankhoy (Kabansky District)             | 51°32'59.4879'' N,<br>105°7'15.1616'' E, 504 m  | 15.VII.2018     |
| <i>Dryas grandis</i> Juz.                                     | Republic Buryatia, Kyren (Tunkinsky District)              | 51°41'15.4501'' N,<br>102°8'21.8127'' E, 947 m  | 21.VII.2019     |
| <i>D. incisa</i> Juz.                                         | Republic Buryatia, Kyren (Tunkinsky District)              | 51°41'15.4501'' N,<br>102°8'21.8127'' E, 947 m  | 21.VII.2019     |
| <i>D. integrifolia</i> subsp. <i>crenulata</i> (Juz.) Kozhev. | Republic Buryatia, Kyren (Tunkinsky District)              | 51°41'15.4501'' N,<br>102°8'21.8127'' E, 947 m  | 21.VII.2019     |
| <i>D. oxyodonta</i> Juz.                                      | Republic Buryatia, Kyren (Tunkinsky District)              | 51°41'15.4501'' N,<br>102°8'21.8127'' E, 947 m  | 21.VII.2019     |
| <i>D. sumnevicii</i> Serg.                                    | Republic Buryatia, Baunt (Bauntovsky District)             | 55°15'37.2172'' N,<br>113°8'57.2040'' E, 1096 m | 01.VIII.2019    |
| <i>Dasiphora parvifolia</i> (Fisch.) Juz.                     | Republic Buryatia, Kolobki (Ivolginsky District)           | 51°38'53.0286'' N,<br>107°23'54.2239'' E, 506 m | 02.VII.2019     |
| <i>Fragaria vesca</i> L.                                      | Republic Buryatia, Mukhorshibir (Mukhorshibirsky district) | 51°1'54.8212'' N,<br>107°54'10.4700'' E, 1003 m | 18.VII.2019     |
| <i>F. orientalis</i> Losinsk.                                 | Republic Buryatia, Mukhorshibir (Mukhorshibirsky district) | 51°1'54.8212'' N,<br>107°54'10.4700'' E, 1003 m | 18.VII.2019     |
| <i>Geum aleppicum</i> Jacq.                                   | Republic Buryatia, Onokhoy (Zaigraevsky District)          | 51°55'10.1889'' N,<br>108°3'26.4983'' E, 544 m  | 03.VII.2019     |
| <i>G. rivale</i> L.                                           | Republic Buryatia, Zun-Murino (Tunkinsky District)         | 51°44'27.2468'' N,<br>102°53'40.4121'' E, 724 m | 23.VII.2018     |
| <i>Malus baccata</i> (L.) Borkh.                              | Republic Buryatia, Podlopatki (Mukhorshibirsky District)   | 50°54'50.8598'' N,<br>107°6'9.5972'' E, 647 m   | 29.V.2018       |
| <i>Padus avium</i> Mill.                                      | Republic Buryatia, Zaigraevoye (Zaigraevsky District)      | 51°51'6.8316'' N,<br>108°18'36.9388'' E, 639 m  | 11.VI.2019      |
| <i>Potentilla acaulis</i> L.                                  | Republic Buryatia, Tankhoy (Kabansky District)             | 51°32'59.4879'' N,<br>105°7'15.1616'' E, 504 m  | 15.VII.2018     |
| <i>P. acervata</i> Soják                                      | Republic Buryatia, Baunt (Bauntovsky District)             | 55°15'37.2172'' N,<br>113°8'57.2040'' E, 1096 m | 01.VIII.2019    |
| <i>P. adenotricha</i> Vodop.                                  | Republic Buryatia, Onokhoy (Zaigraevsky District)          | 51°55'10.1889'' N,<br>108°3'26.4983'' E, 544 m  | 03.VII.2019     |
| <i>P. anserina</i> L.                                         | Republic Buryatia, Podlopatki (Mukhorshibirsky District)   | 50°54'50.8598'' N,<br>107°6'9.5972'' E, 647 m   | 29.V.2018       |

Table S1. Continuation

| Species                                     | Collection place                                           | Coordinates                                     | Collection date |
|---------------------------------------------|------------------------------------------------------------|-------------------------------------------------|-----------------|
| <i>P. arenosa</i> (Turcz.) Juz.             | Republic Buryatia, Mukhorshibir (Mukhorshibirsky district) | 51°1'54.8212'' N,<br>107°54'10.4700'' E, 1003 m | 18.VII.2019     |
| <i>P. argentea</i> L.                       | Republic Buryatia, Zun-Murino (Tunkinsky District)         | 51°44'27.2468'' N,<br>102°53'40.4121'' E, 724 m | 23.VII.2018     |
| <i>P. asperrima</i> Turcz.                  | Republic Buryatia, Kyakhta (Kyakhtinsky District)          | 50°22'56.5082'' N,<br>106°26'58.9522'' E, 853 m | 13.VII.2019     |
| <i>P. biflora</i> Willd. ex Schtdl.         | Republic Buryatia, Podlopatki (Mukhorshibirsky District)   | 50°54'50.8598'' N,<br>107°6'9.5972'' E, 647 m   | 29.V.2018       |
| <i>P. chrysantha</i> Trevir.                | Republic Buryatia, Onokhoy (Zaigraevsky District)          | 51°55'10.1889'' N,<br>108°3'26.4983'' E, 544 m  | 03.VII.2019     |
| <i>P. conferta</i> Bunge                    | Republic Buryatia, Zhemchug (Tunkinsky District)           | 51°41'51.0445'' N,<br>102°28'14.9261'' E, 722 m | 17.VII.2019     |
| <i>P. crantzii</i> (Crantz) Beck ex Fritsch | Republic Buryatia, Zaigraeyevo (Zaigraevsky District)      | 51°51'6.8316'' N,<br>108°18'36.9388'' E, 639 m  | 11.VII.2019     |
| <i>P. desertorum</i> Bunge                  | Republic Buryatia, Kabansk (Kabansky District)             | 52°2'54.5243'' N,<br>106°37'34.5456'' E, 461 m  | 23.VII.2019     |
| <i>P. elegans</i> Cham. & Schtdl.           | Republic Buryatia, Tankhoy (Kabansky District)             | 51°32'59.4879'' N,<br>105°7'15.1616'' E, 504 m  | 15.VII.2018     |
| <i>P. evestita</i> Th.Wolf                  | Republic Buryatia, Mukhorshibir (Mukhorshibirsky district) | 51°1'54.8212'' N,<br>107°54'10.4700'' E, 1003 m | 18.VII.2019     |
| <i>P. flagellaris</i> Willd. ex Schtdl.     | Republic Buryatia, Kyakhta (Kyakhtinsky District)          | 50°22'56.5082'' N,<br>106°26'58.9522'' E, 853 m | 13.VII.2019     |
| <i>P. fragarioides</i> L.                   | Republic Buryatia, Kolobki (Ivolginsky District)           | 51°38'53.0286'' N,<br>107°23'54.2239'' E, 506 m | 02.VII.2019     |
| <i>P. kryloviana</i> Th.Wolf                | Republic Buryatia, Kyakhta (Kyakhtinsky District)          | 50°22'56.5082'' N,<br>106°26'58.9522'' E, 853 m | 13.VII.2019     |
| <i>P. leucophylla</i> Pall.                 | Republic Buryatia, Zaigraeyevo (Zaigraevsky District)      | 51°51'6.8316'' N,<br>108°18'36.9388'' E, 639 m  | 11.VII.2019     |
| <i>P. longifolia</i> Willd. ex Schtdl.      | Republic Buryatia, Baunt (Bauntovsky District)             | 55°15'37.2172'' N,<br>113°8'57.2040'' E, 1096 m | 01.VIII.2019    |
| <i>P. multifida</i> L.                      | Republic Buryatia, Onokhoy (Zaigraevsky District)          | 51°55'10.1889'' N,<br>108°3'26.4983'' E, 544 m  | 03.VII.2019     |

Table S1. Continuation

| Species                                   | Collection place                                           | Coordinates                                   | Collection date |
|-------------------------------------------|------------------------------------------------------------|-----------------------------------------------|-----------------|
| <i>P. mujensis</i> Kurbatski              | Republic Buryatia, Severobaykalsk                          | 55°38'56.8229" N,<br>109°20'28.5324" E, 582 m | 02.VIII.2019    |
| <i>P. nivea</i> L.                        | Republic Buryatia, Zun-Murino (Tunkinsky District)         | 51°44'27.2468" N,<br>102°53'40.4121" E, 724 m | 23.VII.2018     |
| <i>P. norvegica</i> L.                    | Republic Buryatia, Mukhorshibir (Mukhorshibirsky district) | 51°1'54.8212" N,<br>107°54'10.4700" E, 1003 m | 18.VII.2019     |
| <i>P. nudicaulis</i> Willd. ex Schtdl.    | Republic Buryatia, Zhemchug (Tunkinsky District)           | 51°41'51.0445" N,<br>102°28'14.9261" E, 722 m | 17.VII.2019     |
| <i>P. ozjorensis</i> Peschkova            | Republic Buryatia, Kabansk (Kabansky District)             | 52°2'54.5243" N,<br>106°37'34.5456" E, 461 m  | 23.VII.2019     |
| <i>P. sanguisorba</i> Willd. ex Schtdl.   | Republic Buryatia, Zaigraeyevo (Zaigraevsky District)      | 51°51'6.8316" N,<br>108°18'36.9388" E, 639 m  | 11.VII.2019     |
| <i>P. saposchnikovii</i> Kurbatski        | Republic Buryatia, Baunt (Bauntovsky District)             | 55°15'37.2172" N,<br>113°8'57.2040" E, 1096 m | 01.VIII.2019    |
| <i>P. sericea</i> L.                      | Republic Buryatia, Kolobki (Ivolginsky District)           | 51°38'53.0286" N,<br>107°23'54.2239" E, 506 m | 02.VII.2019     |
| <i>P. stipularis</i> L.                   | Republic Buryatia, Onokhoy (Zaigraevsky District)          | 51°55'10.1889" N,<br>108°3'26.4983" E, 544 m  | 03.VII.2019     |
| <i>P. tanacetifolia</i> Willd. ex Schtdl. | Republic Buryatia, Kabansk (Kabansky District)             | 52°2'54.5243" N,<br>106°37'34.5456" E, 461 m  | 23.VII.2019     |
| <i>P. tergemina</i> Soják                 | Republic Buryatia, Kolobki (Ivolginsky District)           | 51°38'53.0286" N,<br>107°23'54.2239" E, 506 m | 02.VII.2019     |
| <i>P. verticillaris</i> Stephan ex Willd. | Republic Buryatia, Kyakhta (Kyakhtinsky District)          | 50°22'56.5082" N,<br>106°26'58.9522" E, 853 m | 13.VII.2019     |
| <i>Prunus pedunculata</i> (Pall.) Maxim.  | Republic Buryatia, Zhemchug (Tunkinsky District)           | 51°41'51.0445" N,<br>102°28'14.9261" E, 722 m | 17.VII.2019     |
| <i>Rosa acicularis</i> Lindl.             | Republic Buryatia, Mukhorshibir (Mukhorshibirsky district) | 51°1'54.8212" N,<br>107°54'10.4700" E, 1003 m | 18.VII.2019     |
| <i>R. davurica</i> Pall.                  | Republic Buryatia, Zaigraeyevo (Zaigraevsky District)      | 51°51'6.8316" N,<br>108°18'36.9388" E, 639 m  | 11.VII.2019     |
| <i>Rubus arcticus</i> L.                  | Republic Buryatia, Tankhoy (Kabansky District)             | 51°32'59.4879" N,<br>105°7'15.1616" E, 504 m  | 15.VII.2018     |

Table S1. Continuation

| Species                                                       | Collection place                                           | Coordinates                                     | Collection date |
|---------------------------------------------------------------|------------------------------------------------------------|-------------------------------------------------|-----------------|
| <i>Rubus chamaemorus</i> L.                                   | Republic Buryatia, Zun-Murino (Tunkinsky District)         | 51°44'27.2468'' N,<br>102°53'40.4121'' E, 724 m | 23.VII.2018     |
| <i>R. humulifolius</i> C.A. Mey.                              | Republic Buryatia, Onokhoy (Zaigraevsky District)          | 51°55'10.1889'' N,<br>108°3'26.4983'' E, 544 m  | 03.VII.2019     |
| <i>R. matsumuranus</i> H. Lev. & Vaniot                       | Republic Buryatia, Tankhoy (Kabansky District)             | 51°32'59.4879'' N,<br>105°7'15.1616'' E, 504 m  | 15.VII.2018     |
| <i>R. saxatilis</i> L.                                        | Republic Buryatia, Mukhorshibir (Mukhorshibirsky district) | 51°1'54.8212'' N,<br>107°54'10.4700'' E, 1003 m | 18.VII.2019     |
| <i>Sanguisorba alpina</i> Bunge                               | Republic Buryatia, Severobaykalsk                          | 55°38'56.8229'' N,<br>109°20'28.5324'' E, 582 m | 02.VIII.2019    |
| <i>S. officinalis</i> L.                                      | Republic Buryatia, Kabansk (Kabansky District)             | 52°2'54.5243'' N,<br>106°37'34.5456'' E, 461 m  | 23.VII.2019     |
| <i>Sibbaldia adpressa</i> Bunge                               | Republic Buryatia, Zun-Murino (Tunkinsky District)         | 51°44'27.2468'' N,<br>102°53'40.4121'' E, 724 m | 23.VII.2018     |
| <i>S. procumbens</i> L.                                       | Republic Buryatia, Kyakhta (Kyakhtinsky District)          | 50°22'56.5082'' N,<br>106°26'58.9522'' E, 853 m | 13.VII.2019     |
| <i>Sibbaldianthe bifurca</i> (L.) Kurtto & T.Erikss.          | Republic Buryatia, Zhemchug (Tunkinsky District)           | 51°41'51.0445'' N,<br>102°28'14.9261'' E, 722 m | 17.VII.2019     |
| <i>S. bifurca subsp. orientalis</i> (Juz.) Kurtto & T.Erikss. | Republic Buryatia, Kolobki (Ivolginsky District)           | 51°38'53.0286'' N,<br>107°23'54.2239'' E, 506 m | 02.VII.2019     |
| <i>Sorbaria pallasii</i> (G. Don fil.) Pojark.                | Republic Buryatia, Podlopatki (Mukhorshibirsky District)   | 50°54'50.8598'' N,<br>107°6'9.5972'' E, 647 m   | 29.V.2018       |
| <i>S. sorbifolia</i> (L.) A. Braun                            | Republic Buryatia, Severobaykalsk                          | 55°38'56.8229'' N,<br>109°20'28.5324'' E, 582 m | 02.VIII.2019    |
| <i>Sorbus sibirica</i> Hedl.                                  | Republic Buryatia, Podlopatki (Mukhorshibirsky District)   | 50°54'50.8598'' N,<br>107°6'9.5972'' E, 647 m   | 29.V.2018       |
| <i>Spiraea alpina</i> Pall.                                   | Republic Buryatia, Zhemchug (Tunkinsky District)           | 51°41'51.0445'' N,<br>102°28'14.9261'' E, 722 m | 17.VII.2019     |
| <i>S. aquilegifolia</i> Pall.                                 | Republic Buryatia, Baunt (Bauntovsky District)             | 55°15'37.2172'' N,<br>113°8'57.2040'' E, 1096 m | 01.VIII.2019    |
| <i>S. dahurica</i> (Rupr.) Maxim.                             | Republic Buryatia, Podlopatki (Mukhorshibirsky District)   | 50°54'50.8598'' N,<br>107°6'9.5972'' E, 647 m   | 29.V.2018       |
| <i>S. flexuosa</i> Fisch. ex Cambess.                         | Republic Buryatia, Kolobki (Ivolginsky District)           | 51°38'53.0286'' N,<br>107°23'54.2239'' E, 506 m | 02.VII.2019     |

Table S1. Continuation

| Species                  | Collection place                                           | Coordinates                                     | Collection date |
|--------------------------|------------------------------------------------------------|-------------------------------------------------|-----------------|
| <i>S. media</i> Schmidt  | Republic Buryatia, Mukhorshibir (Mukhorshibirsky district) | 51°1'54.8212'' N,<br>107°54'10.4700'' E, 1003 m | 18.VII.2019     |
| <i>S. salicifolia</i> L. | Republic Buryatia, Kabansk (Kabansky District)             | 52°2'54.5243'' N,<br>106°37'34.5456'' E, 461 m  | 23.VII.2019     |

Table S2. Mass spectrometric parameters of compounds 1–60.

| No | ESI-MS,<br>[M–H] <sup>−</sup> ,<br>m/z | ESI-MS,<br>MS/MS,<br>m/z                  | Parent<br>ion, m/z | Daughter<br>ion, m/z | Declustering<br>potential, V | Collision<br>energy,<br>V | Compound                                                        |
|----|----------------------------------------|-------------------------------------------|--------------------|----------------------|------------------------------|---------------------------|-----------------------------------------------------------------|
| 1  | 341                                    | 179                                       | 341                | 179                  | -35                          | -5                        | Hexosyl- <i>O</i> -hexose                                       |
| 2  | 331                                    | 169                                       | 331                | 169                  | -47                          | -15                       | 1- <i>O</i> -Galloyl-glucose                                    |
| 3  | 331                                    | 169                                       | 331                | 169                  | -50                          | -15                       | <i>O</i> -Galloyl-glucose                                       |
| 4  | 331                                    | 169                                       | 331                | 169                  | -40                          | -15                       | <i>O</i> -Galloyl-glucose                                       |
| 5  | 331                                    | 169                                       | 331                | 169                  | -45                          | -15                       | <i>O</i> -Galloyl-glucose                                       |
| 6  | 183                                    | 139                                       | 183                | 139                  | -65                          | -20                       | 2-Pyrone-4,6-dicarboxylic acid                                  |
| 7  | 783                                    | 633, 481, 301                             | 783                | 301                  | -72                          | -15                       | Pedunculagin                                                    |
| 8  | 353                                    | 191, 179, 173, 135                        | 353                | 191                  | -30                          | -10                       | 4- <i>O</i> -Caffeoylquinic acid                                |
| 9  | 783                                    | 621, 471, 301                             | 783                | 621                  | -55                          | -15                       | Casuarinin                                                      |
| 10 | 577                                    | 305, 289                                  | 577                | 289                  | -85                          | -30                       | Procyanidin B1                                                  |
| 11 | 785                                    | 623, 473, 301                             | 785                | 623                  | -75                          | -20                       | Tellimagrandin I <sub>1</sub>                                   |
| 12 | 577                                    | 305, 289                                  | 577                | 289                  | -80                          | -35                       | Procyanidin B3                                                  |
| 13 | 289                                    | 125                                       | 289                | 125                  | -94                          | -25                       | (+)-Catechin                                                    |
| 14 | 353                                    | 191, 165                                  | 353                | 191                  | -30                          | -10                       | 5- <i>O</i> -Caffeoylquinic acid                                |
| 15 | 305                                    | 155, 125                                  | 305                | 125                  | -55                          | -20                       | (-)-Epigallocatechin                                            |
| 16 | 577                                    | 289                                       | 577                | 289                  | -80                          | -30                       | Procyanidin B2                                                  |
| 17 | 447                                    | 315, 301                                  | 447                | 315                  | -105                         | -35                       | Ellagic acid- <i>O</i> -methyl ester- <i>O</i> -pentoside       |
| 18 | 937                                    | 775, 625, 475                             | 937                | 775                  | -85                          | -20                       | Tri- <i>O</i> -galloyl- <i>O</i> -hexahydroxy diphenoyl-glucose |
| 19 | 785                                    | 623, 473, 301                             | 785                | 623                  | -75                          | -20                       | Tellimagrandin I <sub>2</sub>                                   |
| 20 | 577                                    | 305, 289                                  | 577                | 289                  | -85                          | -20                       | Procyanidin dimer                                               |
| 21 | 783                                    | 621, 391                                  | 783                | 621                  | -87                          | -25                       | Bis- <i>O</i> -hexahydroxydiphenoyl-glucose                     |
| 22 | 785                                    | 623, 321, 301                             | 785                | 623                  | -85                          | -20                       | Di- <i>O</i> -galloyl- <i>O</i> -hexahydroxy diphenoyl-glucose  |
| 23 | 289                                    | 125                                       | 289                | 125                  | -94                          | -20                       | (-)-Epicatechin                                                 |
| 24 | 337                                    | 301, 275, 249                             | 337                | 301                  | -102                         | -30                       | Hexahydroxydiphenic acid                                        |
| 25 | 785                                    | 623, 321, 301                             | 785                | 623                  | -82                          | -15                       | Di- <i>O</i> -galloyl- <i>O</i> -hexahydroxy diphenoyl-glucose  |
| 26 | 515                                    | 353, 191, 179                             | 515                | 191                  | -35                          | -10                       | 1,3-Di- <i>O</i> -caffeoylquinic acid                           |
| 27 | 783                                    | 621, 391                                  | 783                | 621                  | -75                          | -25                       | Bis- <i>O</i> -hexahydroxydiphenoyl-glucose                     |
| 28 | 463                                    | 301                                       | 463                | 301                  | -72                          | -30                       | 6-Hydroxyluteolin-7- <i>O</i> -Glc                              |
| 29 | 783                                    | 621, 391                                  | 783                | 621                  | -79                          | -25                       | Bis- <i>O</i> -hexahydroxydiphenoyl-glucose                     |
| 30 | 577                                    | 289                                       | 577                | 289                  | -80                          | -30                       | Procyanidin dimer                                               |
| 31 | 937                                    | 785, 623, 473, 301                        | 937                | 785                  | -87                          | -20                       | Tellimagrandin II <sub>1</sub>                                  |
| 32 | 935                                    | 633, 463, 301                             | 935                | 633                  | -80                          | -20                       | Potentillin                                                     |
| 33 | 1103                                   | 801, 783, 499, 481, 319, 301              | 1103               | 801                  | -75                          | -25                       | Agrimonic acid A                                                |
| 34 | 1871                                   | 1263, 1083, 933, 781, 301                 | 1871               | 933                  | -95                          | -20                       | Gemin A                                                         |
| 35 | 1103                                   | 801, 783, 499, 481, 319, 301              | 1103               | 801                  | -80                          | -25                       | Agrimonic acid B                                                |
| 36 | 1869                                   | 1567, 1265, 1085, 935, 783, 633, 481, 301 | 1869               | 935                  | -85                          | -25                       | Agrimoniin                                                      |
| 37 | 441                                    | 291                                       | 441                | 291                  | -64                          | -20                       | (-)-Epicatechin gallate                                         |
| 38 | 301                                    | 285                                       | 301                | 285                  | -120                         | -40                       | Ellagic acid                                                    |
| 39 | 609                                    | 463, 301                                  | 609                | 301                  | -106                         | -30                       | Quercetin-3- <i>O</i> -(6''- <i>O</i> -rhamnosyl)-glucoside     |
| 40 | 937                                    | 785, 623, 473, 301                        | 937                | 785                  | -85                          | -25                       | Tellimagrandin II <sub>2</sub>                                  |
| 41 | 463                                    | 301                                       | 463                | 301                  | -100                         | -30                       | Quercetin-3- <i>O</i> -glucoside                                |
| 42 | 477                                    | 301                                       | 477                | 301                  | -105                         | -30                       | Quercetin-3- <i>O</i> -glucuronide                              |
| 43 | 447                                    | 285                                       | 447                | 285                  | -110                         | -35                       | Luteolin-7- <i>O</i> -glucoside                                 |
| 44 | 461                                    | 285                                       | 461                | 285                  | -110                         | -35                       | Luteolin-7- <i>O</i> -glucuronide                               |
| 45 | 549                                    | 301                                       | 549                | 301                  | -95                          | -30                       | Quercetin-3- <i>O</i> -(6'- <i>O</i> -malonyl)-glucoside        |
| 46 | 515                                    | 353, 191, 179                             | 515                | 191                  | -40                          | -15                       | 3,5-Di- <i>O</i> -caffeoylquinic acid                           |
| 47 | 593                                    | 447, 285                                  | 593                | 285                  |                              |                           | Kaempferol-3- <i>O</i> -(6'- <i>O</i> -rhamnosyl)-glucoside     |
| 48 | 447                                    | 301                                       | 447                | 301                  | -105                         | -30                       | Quercetin-3- <i>O</i> -rhamnoside                               |
| 49 | 447                                    | 285                                       | 447                | 285                  | -110                         | -35                       | Kaempferol-3- <i>O</i> -glucoside                               |
| 50 | 431                                    | 269                                       | 431                | 269                  | -105                         | -30                       | Apigenin-7- <i>O</i> -glucoside                                 |
| 51 | 445                                    | 269                                       | 445                | 269                  | -110                         | -35                       | Apigenin-7- <i>O</i> -glucuronide                               |
| 52 | 533                                    | 285                                       | 533                | 285                  | -106                         | -30                       | Kaempferol- <i>O</i> -malonyl- <i>O</i> -hexoside               |



Table S2. Continuation

| No | ESI-MS,<br>[M-H] <sup>-</sup> ,<br>m/z | ESI-MS,<br>MS/MS,<br>m/z | Parent<br>ion, m/z | Daughter<br>ion, m/z | Declustering<br>potential, V | Collision<br>energy,<br>V | Compound                                         |
|----|----------------------------------------|--------------------------|--------------------|----------------------|------------------------------|---------------------------|--------------------------------------------------|
| 53 | 533                                    | 285                      | 533                | 285                  | -115                         | -30                       | Luteolin-3-O-(6''-O-malonyl)-<br>glucoside       |
| 54 | 431                                    | 285                      | 431                | 285                  | -115                         | -35                       | Kaempferol-3-O-rhamnoside                        |
| 55 | 609                                    | 301                      | 609                | 301                  | -104                         | -30                       | Quercetin-3-O-(6''-O-p-<br>coumaroyl)-glucoside  |
| 56 | 593                                    | 285                      | 593                | 285                  | -110                         | -30                       | Kaempferol-3-O-(6''-O-p-<br>coumaroyl)-glucoside |
| 57 | 329                                    | 315, 301                 | 329                | 315                  | -130                         | -40                       | Ellagic acid di-O-methyl ester                   |
| 58 | 593                                    | 285                      | 593                | 285                  | -115                         | -35                       | Luteolin-7-O-(6''-O-p-coumaroyl)-<br>glucoside   |
| 59 | 517                                    | 269                      | 517                | 269                  | -120                         | -35                       | Apigenin-7-O-(6''-O-p-malonyl)-<br>glucoside     |
| 60 | 577                                    | 269                      | 577                | 269                  | -120                         | -35                       | Apigenin-7-O-(6''-O-p-<br>coumaroyl)-glucoside   |
